# Supplementary material for: Geriatric screening tools are of limited value to predict decline in functional status and quality of life: results of a cohort study
Source: PubMed Central journal article supplement (PMC4358725; doi:10.1186/s12875-015-0241-x), 2015-03-03
Supplement: 12875_2015_241_MOESM1_ESM.pdf [file 12875_2015_241_MOESM1_ESM.pdf]

**Additional Table 1. Baseline population characteristics for participants included and excluded from analyses<sup>a</sup>**

|                                   | Older cancer patients |         |          |         |             | Older persons without cancer |         |          |         |         |
|-----------------------------------|-----------------------|---------|----------|---------|-------------|------------------------------|---------|----------|---------|---------|
|                                   | Analysed              |         | Excluded |         | P-value     | Analysed                     |         | Excluded |         | P-value |
|                                   | N = 134               |         | N = 46   |         |             | N = 220                      |         | N = 103  |         |         |
|                                   | N                     | %       | N        | %       |             | N                            | %       | N        | %       |         |
| <b>Age: mean (SD)</b>             | 77.1                  | (5.11)  | 77.46    | (4.86)  | 0.68        | 78.13                        | (5.47)  | 78.26    | (5.60)  | 0.84    |
| <b>Gender</b>                     |                       |         |          |         | 0.40        |                              |         |          |         | 0.69    |
| Male                              | 28                    | 21%     | 7        | 15%     |             | 82                           | 37%     | 36       | 35%     |         |
| Female                            | 106                   | 79%     | 39       | 85%     |             | 138                          | 63%     | 67       | 65%     |         |
| <b>Living conditions</b>          |                       |         |          |         | 0.83        |                              |         |          |         | 0.51    |
| Alone                             | 44                    | 33%     | 12       | 26%     |             | 72                           | 33%     | 27       | 26%     |         |
| With partner                      | 71                    | 53%     | 26       | 57%     |             | 124                          | 56%     | 62       | 60%     |         |
| With friends/family               | 11                    | 8%      | 5        | 11%     |             | 20                           | 9%      | 13       | 13%     |         |
| Institutionalised                 | 8                     | 6%      | 3        | 7%      |             | 4                            | 2%      | 1        | 1%      |         |
| <b>Cancer site</b>                |                       |         |          |         | 0.98        |                              |         |          |         |         |
| Breast                            | 93                    | 69%     | 32       | 70%     |             |                              |         |          |         |         |
| Colorectal                        | 41                    | 31%     | 14       | 30%     |             |                              |         |          |         |         |
| <b>Cancer treatment</b>           |                       |         |          |         |             |                              |         |          |         |         |
| Surgery                           | 125                   | 93%     | 41       | 89%     | 0.28        |                              |         |          |         |         |
| Chemotherapy                      | 39                    | 29%     | 19       | 41%     | 0.13        |                              |         |          |         |         |
| Radiotherapy                      | 70                    | 52%     | 27       | 59%     | 0.45        |                              |         |          |         |         |
| Hormonal therapy                  | 53                    | 40%     | 17       | 37%     | 0.75        |                              |         |          |         |         |
| Immunotherapy                     | 19                    | 14%     | 3        | 7%      | 0.17        |                              |         |          |         |         |
| Missing                           | 3                     | 2%      | 1        | 2%      |             |                              |         |          |         |         |
| <b>Cancer Stage</b>               |                       |         |          |         | <b>0.04</b> |                              |         |          |         |         |
| I                                 | 22                    | 16%     | 10       | 22%     |             |                              |         |          |         |         |
| II                                | 72                    | 54%     | 17       | 37%     |             |                              |         |          |         |         |
| III                               | 18                    | 13%     | 13       | 28%     |             |                              |         |          |         |         |
| Missing                           | 22                    | 16%     | 6        | 13%     |             |                              |         |          |         |         |
| <b>Geriatric screening tools</b>  |                       |         |          |         |             |                              |         |          |         |         |
| aCGA: Abnormal score              | 80                    | 70%     | 27       | 59%     | 0.42        | 118                          | 58%     | 67       | 68%     | 0.11    |
| G8: Abnormal score                | 79                    | 64%     | 22       | 51%     | 0.13        | 114                          | 54%     | 54       | 56%     | 0.72    |
| GFI: Abnormal score               | 36                    | 49%     | 11       | 48%     | 0.95        | 94                           | 47%     | 54       | 57%     | 0.08    |
| VES-13: Abnormal score            | 43                    | 51%     | 19       | 61%     | 0.31        | 104                          | 49%     | 62       | 61%     | 0.05    |
| <b>Functional impairment</b>      | 97                    | 72%     | 30       | 65%     | 0.36        | 141                          | 65%     | 69       | 67%     | 0.61    |
| <b>QoL: mean (SD)<sup>b</sup></b> | 69.93                 | (19.30) | 67.5     | (23.20) | 0.57        | 75.91                        | (17.84) | 72.39    | (19.41) | 0.11    |

Abbreviations: QoL, Quality of Life <sup>a</sup> Patients excluded from analyses were patients lost to follow-up, who skipped one year follow-up data collection, or who received a diagnosis of cancer (only applicable to persons without cancer); <sup>b</sup> In one hospital, data collection was integrated in a routine geriatric assessment, therefore QoL was not assessed in the 35 older cancer patients recruited in this hospital.
