# Supplementary material for: Geriatric screening tools are of limited value to predict decline in functional status and quality of life: results of a cohort study
Source: PubMed Central journal article supplement (PMC4358725; doi:10.1186/s12875-015-0241-x), 2015-03-03
Supplement: 12875_2015_241_MOESM2_ESM.pdf [file 12875_2015_241_MOESM2_ESM.pdf]

**Additional Table 2. Sensitivity analysis: mortality was included as functional decline or decline in QoL<sup>a</sup>**

|                                       |                        | N<br>total | Sensitivity |             | Specificity |             | Positive predictive<br>value |             | Negative predictive<br>value |             | Area under the<br>curve |               | Univariate logistic<br>regression |                      | Multivariate logistic<br>regression <sup>d</sup> |                      |
|---------------------------------------|------------------------|------------|-------------|-------------|-------------|-------------|------------------------------|-------------|------------------------------|-------------|-------------------------|---------------|-----------------------------------|----------------------|--------------------------------------------------|----------------------|
|                                       |                        |            | Se          | (95% CI)    | Sp          | (95% CI)    | PPV                          | (95% CI)    | NPV                          | (95% CI)    | AUC                     | (95% CI)      | OR                                | (95% CI)             | OR                                               | (95% CI)             |
| <b>Functional decline<sup>b</sup></b> |                        |            |             |             |             |             |                              |             |                              |             |                         |               |                                   |                      |                                                  |                      |
| <b>aCGA</b>                           | Cancer patients        | 122        | 73%         | (61% - 82%) | 33%         | (20% - 48%) | 62%                          | (51% - 72%) | 44%                          | (28% - 62%) | 0.53                    | (0.44 - 0.61) | 1.28                              | (0.58 - 2.83)        | 0.80                                             | (0.30 - 2.12)        |
|                                       | Persons without cancer | 191        | 69%         | (57% - 79%) | 52%         | (43% - 62%) | 51%                          | (41% - 61%) | 70%                          | (59% - 80%) | 0.61                    | (0.54 - 0.67) | <b>2.41</b>                       | <b>(1.32 - 4.39)</b> | 1.90                                             | (0.94 - 3.86)        |
| <b>G8</b>                             | Cancer patients        | 122        | 63%         | (51% - 74%) | 37%         | (23% - 52%) | 60%                          | (48% - 71%) | 40%                          | (26% - 56%) | 0.50                    | (0.41 - 0.59) | 0.99                              | (0.47 - 2.10)        | 0.60                                             | (0.24 - 1.49)        |
|                                       | Persons without cancer | 191        | 66%         | (55% - 76%) | 57%         | (47% - 66%) | 53%                          | (42% - 63%) | 70%                          | (59% - 79%) | 0.62                    | (0.55 - 0.69) | <b>2.58</b>                       | <b>(1.42 - 4.68)</b> | 1.83                                             | (0.91 - 3.65)        |
| <b>GFI</b>                            | Cancer patients        | 74         | 60%         | (43% - 74%) | 59%         | (41% - 76%) | 66%                          | (49% - 80%) | 53%                          | (36% - 70%) | 0.59                    | (0.48 - 0.71) | 2.15                              | (0.84 - 5.48)        | 1.47                                             | (0.44 - 4.92)        |
|                                       | Persons without cancer | 191        | 60%         | (48% - 71%) | 63%         | (53% - 72%) | 54%                          | (43% - 65%) | 69%                          | (59% - 78%) | 0.62                    | (0.55 - 0.69) | <b>2.56</b>                       | <b>(1.42 - 4.62)</b> | 1.85                                             | (0.93 - 3.70)        |
| <b>VES-13</b>                         | Cancer patients        | 74         | 57%         | (41% - 72%) | 66%         | (47% - 81%) | 69%                          | (51% - 83%) | 54%                          | (37% - 70%) | 0.61                    | (0.50 - 0.73) | 2.55                              | (0.98 - 6.59)        | 2.68                                             | (0.68 - 10.54)       |
|                                       | Persons without cancer | 191        | 64%         | (52% - 74%) | 66%         | (56% - 75%) | 57%                          | (46% - 68%) | 72%                          | (62% - 80%) | 0.65                    | (0.58 - 0.72) | <b>3.38</b>                       | <b>(1.85 - 6.16)</b> | <b>2.89</b>                                      | <b>(1.37 - 6.07)</b> |
| <b>Decline in QoL<sup>c</sup></b>     |                        |            |             |             |             |             |                              |             |                              |             |                         |               |                                   |                      |                                                  |                      |
| <b>aCGA</b>                           | Cancer patients        | 74         | 59%         | (36% - 79%) | 37%         | (24% - 51%) | 28%                          | (16% - 44%) | 68%                          | (48% - 84%) | 0.48                    | (0.35 - 0.60) | 0.83                              | (0.30 - 2.31)        | 0.86                                             | (0.26 - 2.83)        |
|                                       | Persons without cancer | 191        | 59%         | (45% - 72%) | 45%         | (36% - 53%) | 30%                          | (21% - 39%) | 74%                          | (63% - 83%) | 0.52                    | (0.44 - 0.60) | 1.17                              | (0.62 - 2.21)        | 1.17                                             | (0.57 - 2.42)        |
| <b>G8</b>                             | Cancer patients        | 74         | 64%         | (41% - 83%) | 39%         | (25% - 53%) | 30%                          | (18% - 46%) | 71%                          | (51% - 87%) | 0.51                    | (0.39 - 0.63) | 1.09                              | (0.39 - 3.07)        | 1.02                                             | (0.31 - 3.36)        |
|                                       | Persons without cancer | 191        | 44%         | (31% - 59%) | 44%         | (35% - 53%) | 24%                          | (16% - 33%) | 67%                          | (56% - 76%) | 0.44                    | (0.36 - 0.52) | 0.62                              | (0.33 - 1.18)        | 0.50                                             | (0.24 - 1.06)        |
| <b>GFI</b>                            | Cancer patients        | 74         | 55%         | (32% - 76%) | 50%         | (36% - 64%) | 32%                          | (18% - 49%) | 72%                          | (55% - 86%) | 0.52                    | (0.40 - 0.65) | 1.20                              | (0.44 - 3.26)        | 1.27                                             | (0.38 - 4.20)        |
|                                       | Persons without cancer | 191        | 46%         | (33% - 60%) | 53%         | (45% - 62%) | 28%                          | (19% - 39%) | 72%                          | (62% - 80%) | 0.50                    | (0.42 - 0.58) | 0.98                              | (0.52 - 1.85)        | 0.91                                             | (0.44 - 1.89)        |
| <b>VES-13</b>                         | Cancer patients        | 74         | 50%         | (28% - 72%) | 54%         | (40% - 68%) | 31%                          | (17% - 49%) | 72%                          | (55% - 85%) | 0.52                    | (0.39 - 0.65) | 1.17                              | (0.43 - 3.16)        | 1.07                                             | (0.28 - 4.16)        |
|                                       | Persons without cancer | 191        | 46%         | (33% - 60%) | 53%         | (45% - 62%) | 28%                          | (19% - 39%) | 72%                          | (62% - 80%) | 0.50                    | (0.42 - 0.58) | 0.98                              | (0.52 - 1.85)        | 0.91                                             | (0.43 - 1.96)        |

Abbreviations: QoL, Quality of Life; aCGA, abbreviated Comprehensive Geriatric Assessment; GFI, Groningen Frailty Indicator; VES-13, Vulnerable Elders Survey-13; Se, sensitivity; Sp, specificity; PPV, positive predictive value; NPV, negative predictive value, OR, odds ratio; 95% CI, 95% confidence interval; <sup>a</sup> For the diagnostic accuracy of geriatric screening tools to predict decline in functional status and QoL, mortality, defined as death within one year after baseline evaluation, was included as a positive endpoint, for both functional decline or decline in QoL; <sup>b</sup> Functional decline was defined as deterioration one or more domains of ADL and/or IADL compared to baseline; <sup>c</sup> Decline in QoL was defined as a difference of  $\geq 10$  points; <sup>d</sup> Multivariate logistic regression: adjusted for age, gender, and number of medicines. For cancer patients we also adjusted for stage, type of cancer, and type of treatment.

**Additional Table 3. Sensitivity analysis: missing values were imputed as best and worst case scenario<sup>a</sup>**

|                                       |                        | N<br>total | Sensitivity |             | Specificity |             | Positive predictive<br>value |             | Negative predictive<br>value |             | Area under the<br>curve |               | Univariate logistic<br>regression |                      | Multivariate logistic<br>regression <sup>d</sup> |                      |
|---------------------------------------|------------------------|------------|-------------|-------------|-------------|-------------|------------------------------|-------------|------------------------------|-------------|-------------------------|---------------|-----------------------------------|----------------------|--------------------------------------------------|----------------------|
|                                       |                        |            | Se          | (95% CI)    | Sp          | (95% CI)    | PPV                          | (95% CI)    | NPV                          | (95% CI)    | AUC                     | (95% CI)      | OR                                | (95% CI)             | OR                                               | (95% CI)             |
| <b>Best case scenario</b>             |                        |            |             |             |             |             |                              |             |                              |             |                         |               |                                   |                      |                                                  |                      |
| <b>Functional decline<sup>b</sup></b> |                        |            |             |             |             |             |                              |             |                              |             |                         |               |                                   |                      |                                                  |                      |
| <b>aCGA</b>                           | Cancer patients        | 125        | 64%         | (52% - 75%) | 46%         | (32% - 61%) | 63%                          | (51% - 74%) | 48%                          | (34% - 63%) | 0.55                    | (0.47 - 0.64) | 1.55                              | (0.75 - 3.20)        | 1.05                                             | (0.45 - 2.49)        |
|                                       | Persons without cancer | 212        | 60%         | (50% - 71%) | 53%         | (44% - 62%) | 49%                          | (40% - 59%) | 64%                          | (54% - 73%) | 0.57                    | (0.50 - 0.63) | <b>1.72</b>                       | <b>(0.99 - 2.98)</b> | 1.44                                             | (0.77 - 2.71)        |
| <b>G8</b>                             | Cancer patients        | 125        | 63%         | (51% - 74%) | 37%         | (24% - 51%) | 58%                          | (47% - 69%) | 41%                          | (27% - 57%) | 0.50                    | (0.41 - 0.58) | 0.98                              | (0.47 - 2.05)        | 0.60                                             | (0.25 - 1.44)        |
|                                       | Persons without cancer | 212        | 64%         | (53% - 74%) | 55%         | (46% - 64%) | 52%                          | (42% - 61%) | 67%                          | (57% - 76%) | 0.60                    | (0.53 - 0.66) | <b>2.18</b>                       | <b>(1.25 - 3.81)</b> | <b>1.75</b>                                      | (0.91 - 3.33)        |
| <b>GFI</b>                            | Cancer patients        | 83         | 50%         | (35% - 65%) | 64%         | (47% - 79%) | 61%                          | (44% - 77%) | 53%                          | (38% - 68%) | 0.57                    | (0.46 - 0.68) | 1.79                              | (0.74 - 4.31)        | 1.47                                             | (0.49 - 4.42)        |
|                                       | Persons without cancer | 212        | 55%         | (44% - 65%) | 65%         | (55% - 73%) | 54%                          | (43% - 64%) | 66%                          | (56% - 74%) | 0.60                    | (0.53 - 0.66) | <b>2.21</b>                       | <b>(1.27 - 3.86)</b> | <b>2.00</b>                                      | <b>(1.07 - 3.74)</b> |
| <b>VES-13</b>                         | Cancer patients        | 83         | 64%         | (48% - 78%) | 64%         | (47% - 79%) | 67%                          | (51% - 80%) | 61%                          | (45% - 76%) | 0.64                    | (0.53 - 0.74) | <b>3.13</b>                       | <b>(1.27 - 7.67)</b> | 3.16                                             | (0.87 - 11.53)       |
|                                       | Persons without cancer | 212        | 63%         | (52% - 73%) | 63%         | (54% - 71%) | 56%                          | (46% - 66%) | 69%                          | (60% - 78%) | 0.63                    | (0.56 - 0.69) | <b>2.83</b>                       | <b>(1.61 - 4.97)</b> | <b>2.85</b>                                      | <b>(1.45 - 5.59)</b> |
| <b>Decline in QoL<sup>c</sup></b>     |                        |            |             |             |             |             |                              |             |                              |             |                         |               |                                   |                      |                                                  |                      |
| <b>aCGA</b>                           | Cancer patients        | 83         | 47%         | (24% - 71%) | 48%         | (36% - 61%) | 21%                          | (10% - 37%) | 76%                          | (60% - 88%) | 0.48                    | (0.35 - 0.61) | 0.85                              | (0.30 - 2.36)        | 0.80                                             | (0.24 - 2.67)        |
|                                       | Persons without cancer | 212        | 56%         | (43% - 68%) | 48%         | (40% - 57%) | 31%                          | (23% - 41%) | 72%                          | (62% - 81%) | 0.52                    | (0.45 - 0.59) | 1.17                              | (0.65 - 2.11)        | 1.32                                             | (0.68 - 2.58)        |
| <b>G8</b>                             | Cancer patients        | 83         | 74%         | (49% - 91%) | 34%         | (23% - 47%) | 25%                          | (14% - 38%) | 82%                          | (62% - 94%) | 0.54                    | (0.42 - 0.66) | 1.47                              | (0.47 - 4.60)        | 1.43                                             | (0.39 - 5.29)        |
|                                       | Persons without cancer | 212        | 44%         | (32% - 58%) | 44%         | (36% - 52%) | 25%                          | (17% - 34%) | 65%                          | (55% - 74%) | 0.44                    | (0.37 - 0.51) | 0.62                              | (0.34 - 1.12)        | 0.55                                             | (0.27 - 1.10)        |
| <b>GFI</b>                            | Cancer patients        | 83         | 37%         | (16% - 62%) | 55%         | (42% - 67%) | 19%                          | (8% - 36%)  | 75%                          | (60% - 86%) | 0.46                    | (0.33 - 0.59) | 0.70                              | (0.25 - 2.02)        | 0.58                                             | (0.16 - 2.08)        |
|                                       | Persons without cancer | 212        | 41%         | (29% - 54%) | 55%         | (47% - 63%) | 28%                          | (19% - 38%) | 69%                          | (60% - 77%) | 0.48                    | (0.41 - 0.56) | 0.86                              | (0.47 - 1.56)        | 0.94                                             | (0.49 - 1.83)        |
| <b>VES-13</b>                         | Cancer patients        | 83         | 53%         | (29% - 76%) | 50%         | (37% - 63%) | 24%                          | (12% - 40%) | 78%                          | (62% - 89%) | 0.51                    | (0.38 - 0.64) | 1.11                              | (0.40 - 3.10)        | 0.54                                             | (0.12 - 2.51)        |
|                                       | Persons without cancer | 212        | 46%         | (33% - 59%) | 51%         | (43% - 59%) | 28%                          | (20% - 38%) | 69%                          | (60% - 78%) | 0.49                    | (0.41 - 0.56) | 0.89                              | (0.49 - 1.60)        | 0.94                                             | (0.47 - 1.88)        |
| <b>Worst case scenario</b>            |                        |            |             |             |             |             |                              |             |                              |             |                         |               |                                   |                      |                                                  |                      |
| <b>Functional decline<sup>a</sup></b> |                        |            |             |             |             |             |                              |             |                              |             |                         |               |                                   |                      |                                                  |                      |
| <b>aCGA</b>                           | Cancer patients        | 125        | 75%         | (64% - 85%) | 31%         | (19% - 45%) | 60%                          | (50% - 71%) | 47%                          | (30% - 65%) | 0.53                    | (0.45 - 0.61) | 1.36                              | (0.61 - 3.00)        | 0.88                                             | (0.34 - 2.30)        |
|                                       | Persons without cancer | 212        | 73%         | (62% - 81%) | 50%         | (40% - 59%) | 52%                          | (43% - 61%) | 71%                          | (60% - 80%) | 0.61                    | (0.55 - 0.68) | <b>2.60</b>                       | <b>(1.45 - 4.65)</b> | <b>2.57</b>                                      | <b>(1.32 - 5.00)</b> |
| <b>G8</b>                             | Cancer patients        | 125        | 66%         | (54% - 77%) | 37%         | (24% - 51%) | 59%                          | (48% - 70%) | 43%                          | (28% - 59%) | 0.51                    | (0.43 - 0.60) | 1.11                              | (0.53 - 2.32)        | 0.67                                             | (0.28 - 1.63)        |
|                                       | Persons without cancer | 212        | 65%         | (54% - 75%) | 54%         | (44% - 63%) | 51%                          | (42% - 61%) | 67%                          | (57% - 76%) | 0.59                    | (0.53 - 0.66) | <b>2.14</b>                       | <b>(1.22 - 3.74)</b> | <b>1.69</b>                                      | (0.88 - 3.25)        |

|                                   |                        | N<br>total | Sensitivity |             | Specificity |             | Positive predictive<br>value |             | Negative predictive<br>value |             | Area under the<br>curve |               | Univariate logistic<br>regression |                      | Multivariate logistic<br>regression <sup>d</sup> |                      |
|-----------------------------------|------------------------|------------|-------------|-------------|-------------|-------------|------------------------------|-------------|------------------------------|-------------|-------------------------|---------------|-----------------------------------|----------------------|--------------------------------------------------|----------------------|
|                                   |                        |            | Se          | (95% CI)    | Sp          | (95% CI)    | PPV                          | (95% CI)    | NPV                          | (95% CI)    | AUC                     | (95% CI)      | OR                                | (95% CI)             | OR                                               | (95% CI)             |
| <b>GFI</b>                        | Cancer patients        | 83         | 61%         | (46% - 76%) | 51%         | (35% - 68%) | 59%                          | (43% - 73%) | 54%                          | (37% - 71%) | 0.56                    | (0.46 - 0.67) | 1.67                              | (0.70 - 4.00)        | 0.96                                             | (0.30 - 3.03)        |
|                                   | Persons without cancer | 212        | 59%         | (49% - 70%) | 59%         | (49% - 68%) | 52%                          | (42% - 62%) | 66%                          | (56% - 75%) | 0.59                    | (0.52 - 0.66) | <b>2.07</b>                       | <b>(1.19 - 3.60)</b> | 1.70                                             | (0.89 - 3.24)        |
| <b>VES-13</b>                     | Cancer patients        | 83         | 64%         | (48% - 78%) | 62%         | (45% - 77%) | 65%                          | (49% - 79%) | 60%                          | (43% - 75%) | 0.63                    | (0.52 - 0.73) | <b>2.80</b>                       | <b>(1.15 - 6.82)</b> | 2.85                                             | (0.81 - 10.04)       |
|                                   | Persons without cancer | 212        | 65%         | (54% - 75%) | 62%         | (53% - 71%) | 56%                          | (46% - 66%) | 70%                          | (61% - 79%) | 0.63                    | (0.57 - 0.70) | <b>3.01</b>                       | <b>(1.71 - 5.29)</b> | <b>3.12</b>                                      | <b>(1.57 - 6.20)</b> |
| <b>Decline in QoL<sup>c</sup></b> |                        |            |             |             |             |             |                              |             |                              |             |                         |               |                                   |                      |                                                  |                      |
| <b>aCGA</b>                       | Cancer patients        | 83         | 58%         | (34% - 80%) | 31%         | (20% - 44%) | 20%                          | (10% - 33%) | 71%                          | (51% - 87%) | 0.45                    | (0.32 - 0.57) | 0.63                              | (0.22 - 1.79)        | 0.46                                             | (0.11 - 1.88)        |
|                                   | Persons without cancer | 212        | 65%         | (52% - 77%) | 42%         | (34% - 51%) | 32%                          | (24% - 41%) | 74%                          | (64% - 83%) | 0.54                    | (0.47 - 0.61) | 1.37                              | (0.74 - 2.52)        | 1.60                                             | (0.81 - 3.18)        |
| <b>G8</b>                         | Cancer patients        | 83         | 74%         | (49% - 91%) | 34%         | (23% - 47%) | 25%                          | (14% - 38%) | 82%                          | (62% - 94%) | 0.54                    | (0.42 - 0.66) | 1.47                              | (0.47 - 4.60)        | 1.43                                             | (0.39 - 5.29)        |
|                                   | Persons without cancer | 212        | 46%         | (33% - 59%) | 42%         | (34% - 51%) | 25%                          | (18% - 34%) | 65%                          | (55% - 74%) | 0.44                    | (0.37 - 0.52) | 0.62                              | (0.35 - 1.13)        | 0.55                                             | (0.27 - 1.12)        |
| <b>GFI</b>                        | Cancer patients        | 83         | 47%         | (24% - 71%) | 42%         | (30% - 55%) | 20%                          | (9% - 34%)  | 73%                          | (56% - 86%) | 0.45                    | (0.32 - 0.58) | 0.66                              | (0.23 - 1.84)        | 0.39                                             | (0.10 - 1.54)        |
|                                   | Persons without cancer | 212        | 49%         | (36% - 62%) | 51%         | (43% - 59%) | 30%                          | (21% - 40%) | 70%                          | (61% - 79%) | 0.50                    | (0.43 - 0.58) | 1.01                              | (0.56 - 1.82)        | 1.16                                             | (0.58 - 2.31)        |
| <b>VES-13</b>                     | Cancer patients        | 83         | 58%         | (34% - 80%) | 50%         | (37% - 63%) | 26%                          | (14% - 41%) | 80%                          | (64% - 91%) | 0.54                    | (0.41 - 0.67) | 1.38                              | (0.49 - 3.87)        | 0.79                                             | (0.18 - 3.46)        |
|                                   | Persons without cancer | 212        | 49%         | (36% - 62%) | 50%         | (42% - 59%) | 30%                          | (21% - 39%) | 70%                          | (61% - 79%) | 0.50                    | (0.42 - 0.57) | 0.98                              | (0.54 - 1.77)        | 1.08                                             | (0.54 - 2.16)        |

Abbreviations: QoL, Quality of Life; aCGA, abbreviated Comprehensive Geriatric Assessment; GFI, Groningen Frailty Indicator; VES-13, Vulnerable Elders Survey-13; Se, sensitivity; Sp, specificity; PPV, positive predictive value; NPV, negative predictive value, OR, odds ratio; 95% CI, 95% confidence interval

<sup>a</sup>For the diagnostic accuracy of geriatric screening tools to predict decline in functional status and QoL, we performed a sensitivity analysis to assess the influence of missing values, making a worst- and best-case scenario by imputing missing values as either a normal or abnormal score; <sup>b</sup>Functional decline was defined as deterioration one or more domains of ADL and/or IADL compared to baseline; <sup>c</sup>Decline in QoL was defined as a difference of  $\geq 10$  points; <sup>d</sup>Multivariate logistic regression: adjusted for age, gender, and number of medicines. For cancer patients we also adjusted for stage, type of cancer, and type of treatment.

**Additional Table 4. Sensitivity analysis: women separately<sup>a</sup>**

|                                       |                        | N<br>total | Sensitivity |             | Specificity |             | Positive predictive<br>value |             | Negative predictive<br>value |             | Area under the<br>curve |               | Univariate logistic<br>regression |                      | Multivariate logistic<br>regression <sup>d</sup> |                      |
|---------------------------------------|------------------------|------------|-------------|-------------|-------------|-------------|------------------------------|-------------|------------------------------|-------------|-------------------------|---------------|-----------------------------------|----------------------|--------------------------------------------------|----------------------|
|                                       |                        |            | Se          | (95% CI)    | Sp          | (95% CI)    | PPV                          | (95% CI)    | NPV                          | (95% CI)    | AUC                     | (95% CI)      | OR                                | (95% CI)             | OR                                               | (95% CI)             |
| <b>Functional decline<sup>b</sup></b> |                        |            |             |             |             |             |                              |             |                              |             |                         |               |                                   |                      |                                                  |                      |
| <b>aCGA</b>                           | Cancer patients        | 97         | 75%         | (62% - 86%) | 33%         | (19% - 49%) | 61%                          | (49% - 73%) | 48%                          | (29% - 68%) | 0.54                    | (0.45 - 0.63) | 1.48                              | (0.60 - 3.62)        | 2.30                                             | (1.01 - 5.22)        |
|                                       | Persons without cancer | 120        | 74%         | (59% - 87%) | 44%         | (33% - 56%) | 43%                          | (31% - 55%) | 76%                          | (61% - 87%) | 0.59                    | (0.51 - 0.68) | 0.80                              | (0.27 - 2.33)        | 1.84                                             | (0.75 - 4.54)        |
| <b>G8</b>                             | Cancer patients        | 97         | 60%         | (46% - 72%) | 38%         | (23% - 54%) | 58%                          | (44% - 70%) | 40%                          | (24% - 57%) | 0.49                    | (0.39 - 0.59) | 0.89                              | (0.39 - 2.04)        | <b>3.08</b>                                      | <b>(1.39 - 6.79)</b> |
|                                       | Persons without cancer | 120        | 70%         | (54% - 83%) | 57%         | (45% - 68%) | 48%                          | (35% - 61%) | 77%                          | (64% - 87%) | 0.64                    | (0.55 - 0.72) | 0.54                              | (0.20 - 1.46)        | <b>2.80</b>                                      | <b>(1.13 - 6.95)</b> |
| <b>GFI</b>                            | Cancer patients        | 50         | 59%         | (39% - 78%) | 57%         | (35% - 77%) | 62%                          | (41% - 80%) | 54%                          | (33% - 74%) | 0.58                    | (0.44 - 0.72) | 1.89                              | (0.61 - 5.83)        | 1.14                                             | (0.27 - 4.74)        |
|                                       | Persons without cancer | 120        | 61%         | (44% - 75%) | 56%         | (44% - 67%) | 43%                          | (31% - 57%) | 72%                          | (59% - 83%) | 0.58                    | (0.49 - 0.67) | 1.93                              | (0.91 - 4.13)        | 1.52                                             | (0.64 - 3.60)        |
| <b>VES-13</b>                         | Cancer patients        | 50         | 67%         | (46% - 84%) | 57%         | (35% - 77%) | 64%                          | (44% - 81%) | 59%                          | (36% - 79%) | 0.62                    | (0.48 - 0.75) | 2.60                              | (0.82 - 8.20)        | 2.25                                             | (0.51 - 10.03)       |
|                                       | Persons without cancer | 120        | 72%         | (56% - 85%) | 60%         | (48% - 71%) | 50%                          | (37% - 63%) | 79%                          | (67% - 89%) | 0.66                    | (0.57 - 0.75) | <b>3.83</b>                       | <b>(1.71 - 8.59)</b> | <b>3.56</b>                                      | <b>(1.44 - 8.81)</b> |
| <b>Decline in QoL<sup>c</sup></b>     |                        |            |             |             |             |             |                              |             |                              |             |                         |               |                                   |                      |                                                  |                      |
| <b>aCGA</b>                           | Cancer patients        | 50         | 54%         | (25% - 81%) | 35%         | (20% - 53%) | 23%                          | (10% - 41%) | 68%                          | (43% - 87%) | 0.45                    | (0.28 - 0.61) | 0.63                              | (0.18 - 2.28)        | 0.47                                             | (0.09 - 2.34)        |
|                                       | Persons without cancer | 120        | 67%         | (48% - 82%) | 39%         | (29% - 50%) | 29%                          | (19% - 41%) | 76%                          | (61% - 87%) | 0.53                    | (0.43 - 0.63) | 1.28                              | (0.55 - 2.98)        | 1.46                                             | (0.57 - 3.71)        |
| <b>G8</b>                             | Cancer patients        | 50         | 62%         | (32% - 86%) | 46%         | (30% - 63%) | 29%                          | (13% - 49%) | 77%                          | (55% - 92%) | 0.54                    | (0.38 - 0.70) | 1.36                              | (0.37 - 4.95)        | 1.25                                             | (0.29 - 5.29)        |
|                                       | Persons without cancer | 120        | 42%         | (26% - 61%) | 44%         | (33% - 55%) | 22%                          | (13% - 35%) | 67%                          | (53% - 79%) | 0.43                    | (0.33 - 0.53) | 0.57                              | (0.25 - 1.28)        | 0.47                                             | (0.18 - 1.25)        |
| <b>GFI</b>                            | Cancer patients        | 50         | 46%         | (19% - 75%) | 46%         | (30% - 63%) | 23%                          | (9% - 44%)  | 71%                          | (49% - 87%) | 0.46                    | (0.30 - 0.62) | 0.73                              | (0.21 - 2.59)        | 0.62                                             | (0.14 - 2.77)        |
|                                       | Persons without cancer | 120        | 42%         | (26% - 61%) | 47%         | (36% - 58%) | 23%                          | (13% - 36%) | 68%                          | (55% - 80%) | 0.45                    | (0.35 - 0.55) | 0.66                              | (0.29 - 1.47)        | 0.66                                             | (0.26 - 1.66)        |
| <b>VES-13</b>                         | Cancer patients        | 50         | 54%         | (25% - 81%) | 43%         | (27% - 61%) | 25%                          | (11% - 45%) | 73%                          | (50% - 89%) | 0.49                    | (0.32 - 0.65) | 0.89                              | (0.25 - 3.16)        | 0.44                                             | (0.08 - 2.47)        |
|                                       | Persons without cancer | 120        | 49%         | (31% - 67%) | 47%         | (36% - 58%) | 26%                          | (16% - 39%) | 71%                          | (57% - 82%) | 0.48                    | (0.38 - 0.58) | 0.84                              | (0.38 - 1.87)        | 0.86                                             | (0.34 - 2.16)        |

Abbreviations: QoL, Quality of Life; aCGA, abbreviated Comprehensive Geriatric Assessment; GFI, Groningen Frailty Indicator; VES-13, Vulnerable Elders Survey-13; Se, sensitivity; Sp, specificity; PPV, positive predictive value; NPV, negative predictive value, OR, odds ratio; 95% CI, 95% confidence interval; <sup>a</sup> The diagnostic accuracy of geriatric screening tools to predict decline in functional status and QoL in women separately, because the proportion of women in the group of cancer patients was higher as compared to the primary care population without cancer due to the inclusion of breast cancer patients; <sup>b</sup> Functional decline was defined as deterioration one or more domains of ADL and/or IADL compared to baseline; <sup>c</sup> Decline in QoL was defined as a difference of  $\geq 10$  points; <sup>d</sup> Multivariate logistic regression: adjusted for age, gender, and number of medicines. For cancer patients we also adjusted for stage, type of cancer, and type of treatment.

**Additional Table 5. Sensitivity analysis: predicting decline in ADL and IADL separately<sup>a</sup>**

|                                    |                        | N<br>total | Sensitivity |             | Specificity |             | Positive predictive<br>value |             | Negative predictive<br>value |             | Area under the<br>curve |               | Univariate logistic<br>regression |                      | Multivariate logistic<br>regression <sup>d</sup> |                       |
|------------------------------------|------------------------|------------|-------------|-------------|-------------|-------------|------------------------------|-------------|------------------------------|-------------|-------------------------|---------------|-----------------------------------|----------------------|--------------------------------------------------|-----------------------|
|                                    |                        |            | Se          | (95% CI)    | Sp          | (95% CI)    | PPV                          | (95% CI)    | NPV                          | (95% CI)    | AUC                     | (95% CI)      | OR                                | (95% CI)             | OR                                               | (95% CI)              |
| <b>Decline in ADL<sup>b</sup></b>  |                        |            |             |             |             |             |                              |             |                              |             |                         |               |                                   |                      |                                                  |                       |
| <b>aCGA</b>                        | Cancer patients        | 111        | 71%         | (55% - 83%) | 33%         | (22% - 45%) | 41%                          | (30% - 53%) | 63%                          | (45% - 79%) | 0.52                    | (0.43 - 0.61) | 1.17                              | (0.51 - 2.66)        | 0.49                                             | (0.17 - 1.42)         |
|                                    | Persons without cancer | 186        | 60%         | (42% - 75%) | 46%         | (38% - 54%) | 21%                          | (14% - 31%) | 82%                          | (72% - 90%) | 0.53                    | (0.44 - 0.62) | 1.23                              | (0.59 - 2.56)        | 0.59                                             | (0.25 - 1.41)         |
| <b>G8</b>                          | Cancer patients        | 111        | 64%         | (48% - 78%) | 36%         | (25% - 49%) | 39%                          | (28% - 52%) | 60%                          | (43% - 75%) | 0.50                    | (0.41 - 0.59) | 0.98                              | (0.44 - 2.16)        | 0.47                                             | (0.17 - 1.29)         |
|                                    | Persons without cancer | 186        | 65%         | (48% - 80%) | 51%         | (43% - 59%) | 25%                          | (17% - 35%) | 85%                          | (76% - 92%) | 0.58                    | (0.49 - 0.67) | 1.92                              | (0.91 - 4.06)        | 1.30                                             | (0.54 - 3.17)         |
| <b>GFI</b>                         | Cancer patients        | 64         | 55%         | (32% - 76%) | 55%         | (39% - 70%) | 39%                          | (22% - 58%) | 70%                          | (51% - 84%) | 0.55                    | (0.42 - 0.68) | 1.45                              | (0.52 - 4.09)        | 0.61                                             | (0.15 - 2.48)         |
|                                    | Persons without cancer | 186        | 65%         | (48% - 80%) | 60%         | (51% - 68%) | 29%                          | (19% - 40%) | 87%                          | (79% - 93%) | 0.62                    | (0.54 - 0.71) | <b>2.74</b>                       | <b>(1.29 - 5.80)</b> | 1.80                                             | (0.77 - 4.21)         |
| <b>VES-13</b>                      | Cancer patients        | 64         | 55%         | (32% - 76%) | 57%         | (41% - 72%) | 40%                          | (23% - 59%) | 71%                          | (53% - 85%) | 0.56                    | (0.43 - 0.69) | 1.60                              | (0.57 - 4.52)        | 0.58                                             | (0.12 - 2.72)         |
|                                    | Persons without cancer | 186        | 62%         | (45% - 78%) | 59%         | (51% - 67%) | 27%                          | (18% - 38%) | 86%                          | (78% - 92%) | 0.61                    | (0.52 - 0.70) | <b>2.37</b>                       | <b>(1.13 - 4.97)</b> | <b>1.39</b>                                      | <b>(0.58 - 3.33)</b>  |
| <b>Decline in IADL<sup>c</sup></b> |                        |            |             |             |             |             |                              |             |                              |             |                         |               |                                   |                      |                                                  |                       |
| <b>aCGA</b>                        | Cancer patients        | 111        | 82%         | (67% - 93%) | 36%         | (25% - 48%) | 41%                          | (30% - 53%) | 79%                          | (61% - 91%) | 0.59                    | (0.51 - 0.67) | 2.58                              | (1.00 - 6.67)        | 2.46                                             | (0.75 - 8.10)         |
|                                    | Persons without cancer | 182        | 78%         | (64% - 89%) | 53%         | (44% - 62%) | 36%                          | (27% - 46%) | 88%                          | (79% - 94%) | 0.66                    | (0.58 - 0.73) | <b>4.05</b>                       | <b>(1.86 - 8.81)</b> | <b>6.25</b>                                      | <b>(2.46 - 15.92)</b> |
| <b>G8</b>                          | Cancer patients        | 111        | 64%         | (47% - 79%) | 38%         | (26% - 50%) | 36%                          | (25% - 48%) | 66%                          | (49% - 80%) | 0.51                    | (0.41 - 0.60) | 1.07                              | (0.48 - 2.41)        | 0.91                                             | (0.34 - 2.45)         |
|                                    | Persons without cancer | 182        | 67%         | (52% - 81%) | 54%         | (45% - 62%) | 33%                          | (24% - 43%) | 83%                          | (73% - 90%) | 0.61                    | (0.53 - 0.69) | <b>2.39</b>                       | <b>(1.19 - 4.83)</b> | 2.25                                             | (0.99 - 5.11)         |
| <b>GFI</b>                         | Cancer patients        | 63         | 58%         | (34% - 80%) | 55%         | (39% - 70%) | 36%                          | (19% - 55%) | 75%                          | (57% - 89%) | 0.56                    | (0.43 - 0.70) | 1.65                              | (0.56 - 4.89)        | 3.80                                             | (0.75 - 19.19)        |
|                                    | Persons without cancer | 182        | 57%         | (41% - 71%) | 59%         | (50% - 67%) | 32%                          | (22% - 43%) | 80%                          | (71% - 87%) | 0.58                    | (0.49 - 0.66) | 1.86                              | (0.95 - 3.65)        | 1.87                                             | (0.84 - 4.16)         |
| <b>VES-13</b>                      | Cancer patients        | 63         | 63%         | (38% - 84%) | 61%         | (46% - 76%) | 41%                          | (24% - 61%) | 79%                          | (62% - 91%) | 0.62                    | (0.49 - 0.76) | 2.72                              | (0.90 - 8.28)        | <b>7.98</b>                                      | <b>(1.19 - 53.64)</b> |
|                                    | Persons without cancer | 182        | 67%         | (52% - 81%) | 63%         | (55% - 71%) | 38%                          | (28% - 50%) | 85%                          | (77% - 91%) | 0.65                    | (0.57 - 0.73) | <b>3.55</b>                       | <b>(1.75 - 7.22)</b> | <b>5.87</b>                                      | <b>(2.30 - 14.97)</b> |

Abbreviations: ADL, activities of daily living; IADL, instrumental activities of daily living; aCGA, abbreviated Comprehensive Geriatric Assessment; GFI, Groningen Frailty Indicator; VES-13, Vulnerable Elders Survey-13; QoL, Quality of Life; Se, sensitivity; Sp, specificity; PPV, positive predictive value; NPV, negative predictive value, OR, odds ratio; 95% CI, 95% confidence interval; <sup>a</sup>The diagnostic accuracy of geriatric screening tools to predict decline in ADL and IADL separately; <sup>b</sup>Decline in ADL was defined as deterioration on one or more domains of ADL compared to baseline; <sup>c</sup>Decline in IADL was defined as deterioration on one or more domains of ADL compared to baseline; <sup>d</sup>Multivariate logistic regression: adjusted for age, gender, and number of medicines. For cancer patients we also adjusted for stage, type of cancer, and type of treatment.
